# Supplementary material
Source: ML conference proceedings conference paper supplement (https://www.ecva.net/papers/eccv_2022/papers_ECCV/html/136750158_ECCV_2022_paper.php)
Supplement: Supplementary file 2 [file 136750158-supp.zip]

Archive with 3 entries (2 files):
- 1312-supp/1312-code.zip
- 1312-supp/1312-supp.pdf
- 1312-supp/
